# Supplementary material for: How selfish is a thirsty man? A pilot study on comparing sharing behavior with primary and secondary rewards
Source: PLOS journal article supplement (doi:10.1371/journal.pone.0201358), 2018-08-20
Supplement: S1 (10.1371/journal.pone.0201358.s001) [file journal.pone.0201358.s001]

**How selfish is a thirsty man? A pilot study on comparing sharing behavior with primary and secondary rewards**

**- S1 Supporting Information -**

S1 Table. Overview of pilot studies

| Study name and experimenter                   | Question                                                                                              | Design; sample                                                                                                                                                   | Results (in %)                                                                                                                                                                                                |
|-----------------------------------------------|-------------------------------------------------------------------------------------------------------|------------------------------------------------------------------------------------------------------------------------------------------------------------------|---------------------------------------------------------------------------------------------------------------------------------------------------------------------------------------------------------------|
| DG with water<br>(I. Gabriel, 2010)           | Do participants share water differently, depending on their physical state (thirsty vs. not thirsty)? | 2 groups: Group A participated in training, group B did not.<br>Convenience sample University of Klagenfurt; $N = 43$ in each group                              | Offers of participants participating in training session were higher.<br>$M_{\text{control}} = 49.41$ , $SD = 9.01$ , $M_{\text{training}} = 55.93$ , $SD = 16.91$ ; $t(84) = 2.23$ , $p = .03$ , $d = .79$ . |
| UG with water<br>(C. Hechenbichler, 2011)     | How much do participants offer in an UG with water and which offers are accepted?                     | Proposers/ responders; no experimental variation/ control<br><br>Convenience sample from Carinthian police school; $N = 30$ in each group                        | Offers are higher than in regular UG. $M_{\text{offer}} = 62.5$ , $SD = 20.5$ .<br>All offers were accepted, except for 2.                                                                                    |
| Small unfair offers in DG<br>(A. Kause, 2012) | Do participants accept small, unfair offers? How does water compare to money?                         | 2 groups: Group A receives 15% of share, Group B receives 30% of share. $N = 51$ responders, convenience sample at University of Klagenfurt. Involved deception. | <i>Water</i> : 41% accept share as high as 10% of overall amount; 79% accept as high as 30% of overall amount.<br><i>Money</i> : 39% accept 1 out of 10 Euro, 42% accept 2.5 out of 10 Euro.                  |
